# Supplementary material
Source: PubMed Central journal article supplement (PMC9628408)
Supplement: 253_2022_12246_MOESM1_ESM.pdf [file 253_2022_12246_MOESM1_ESM.pdf]

*Applied Microbiology and Biotechnology*

**Amyloid peptides with antimicrobial and/or microbial agglutination activity**

Dongru Chen<sup>1#</sup>, Xiangqi Liu<sup>2#</sup>, Yucong Chen<sup>3</sup>, Huancai Lin<sup>3\*</sup>

1 Department of Orthodontics, Hospital of Stomatology, Guanghua School of Stomatology, Sun Yat-sen University. Guangdong Provincial Key Laboratory of Stomatology. Guangzhou, Guangdong, China

2 Department of Oral and Maxillofacial Surgery, Hospital of Stomatology, Guanghua School of Stomatology, Sun Yat-sen University. Guangdong Provincial Key Laboratory of Stomatology. Guangzhou, Guangdong, China

3 Department of Preventive Dentistry, Hospital of Stomatology, Guanghua School of Stomatology, Sun Yat-sen University. Guangdong Provincial Key Laboratory of Stomatology. Guangzhou, Guangdong, China

Address: Lingyuan Xi 56, Guangzhou, Guangdong, China.

\*Corresponding author: Huancai Lin; Email: [linhc@mail.sysu.edu.cn](mailto:linhc@mail.sysu.edu.cn). Telephone and fax numbers: 020-83744816.

Table S1: Effects and mechanisms of amyloid peptides against bacteria and fungus

| First author                                      | Year | Amyloid peptides or sequence                                | Derives                                                    | functions    | Specific or broad effects                                     | Mechanism            | Cytotoxicity               | Monomers or fibers effect                                                                                 |
|---------------------------------------------------|------|-------------------------------------------------------------|------------------------------------------------------------|--------------|---------------------------------------------------------------|----------------------|----------------------------|-----------------------------------------------------------------------------------------------------------|
| <i>Antimicrobes (antibacteria and antifungus)</i> |      |                                                             |                                                            |              |                                                               |                      |                            |                                                                                                           |
| Wei (Wei et al. 2021)                             | 2021 | Hen Egg-White Lysozyme                                      | Lysozyme                                                   | Antibacteria | Broad (G <sup>+</sup> bacteria, G <sup>-</sup> bacteria)      | Pores formation      | -                          | Lysozyme fibrils showed significantly enhanced antibacterial activity compared to monomers and oligomers. |
| Salinas (Salinas et al. 2021)                     | 2021 | Uperin 3.5                                                  | Skin of Uperoleia mjobergii                                | Antibacteria | G <sup>+</sup> bacteria (Only G <sup>+</sup> bacteria tested) | Membranes disruption | -                          | Both monomers and fibers, but the effect of fibrils is weaker than that of monomers                       |
| Tu (Tu et al. 2021)                               | 2021 | UP(EFVAKLFKF FK), UP-RR(EFVAKLFRF FR), UP-RWR(EFVAKLFR FWR) | PSM $\alpha$ 3 (phenol-soluble modulins $\alpha$ 3)        | Antibacteria | Broad (G <sup>+</sup> and G <sup>-</sup> bacteria)            | Membranes disruption | Excellent biocompatibility | Monomers were added, but the authors think the antibacterial activity derived from formed nanostructures. |
| Engelberg (Engelberg & Landau 2020)               | 2020 | LL-37 <sub>17-29</sub>                                      | LL-37 (37-residue peptide whose N-terminal sequence is LL) | Antibacteria | G <sup>+</sup> bacteria (Only G <sup>+</sup> bacteria tested) | Membranes disruption | -                          | Only monomers tested                                                                                      |

|                                       |      |                                                                                |                                  |                             |                                                                                                                                       |                                                                                                                                               |               |                                                                                      |
|---------------------------------------|------|--------------------------------------------------------------------------------|----------------------------------|-----------------------------|---------------------------------------------------------------------------------------------------------------------------------------|-----------------------------------------------------------------------------------------------------------------------------------------------|---------------|--------------------------------------------------------------------------------------|
| Schnaider (Schnaider et al. 2020)     | 2020 | dhvar2 (KRLFKELLFSL RKY), L7F (KRLFKLFLFSL RKY)                                | Histatin 5                       | Antibacteria and antifungus | Broad (G <sup>+</sup> and G <sup>-</sup> bacteria, bacteria and fungus)                                                               | Membrane permeabilization                                                                                                                     | -             | Only monomers tested                                                                 |
| Khodaparast (Khodaparast et al. 2018) | 2018 | Aggregation prone regions (APRs) derived from <i>Escherichia coli</i> proteome | <i>Escherichia coli</i> proteome | Antibacteria                | Broad (G <sup>-</sup> bacteria tested)                                                                                                | APRs lead to massive and lethal inclusion body formation containing a large number of proteins, inducing the collapse of protein homeostasis. | Non-cytotoxic | Only monomers tested                                                                 |
| Salinas (Salinas et al. 2018)         | 2018 | LFKFFK                                                                         | PSM $\alpha$ 3                   | Antibacteria                | G <sup>+</sup> bacteria ( <i>Micrococcus luteus</i> and <i>Staphylococcus hominis</i> ), but nontoxic to <i>Staphylococcus aureus</i> | -                                                                                                                                             | -             | Only monomers tested                                                                 |
| Schnaider (Schnaider et al. 2017)     | 2017 | Diphenylalanine (FF)                                                           | -                                | Antibacteria                | Broad (G <sup>+</sup> and G <sup>-</sup> bacteria)                                                                                    | Membrane permeabilization and depolarization                                                                                                  | Non-cytotoxic | Both monomers and nanotubes?                                                         |
| Bouaziz (Bouaziz et al. 2017)         | 2017 | Lysozyme monomers, fibers, Zn2Al-NO3-LYS, Zn2Al-NO3-AMY                        | Lysozyme                         | Antibacteria                | G <sup>+</sup> bacteria (Only G <sup>+</sup> bacteria tested)                                                                         | The enzymatic activity depends on the active site integrity and accessibility, and the enzymatic site is not totally denatured in             | -             | Both monomers and fibers, but the effect of fibrils is weaker than that of monomers. |

|                                     |      |                                                 |                                               |                             |                                                                                                     |                                                                                                                                |               |                                                                                                                                    |
|-------------------------------------|------|-------------------------------------------------|-----------------------------------------------|-----------------------------|-----------------------------------------------------------------------------------------------------|--------------------------------------------------------------------------------------------------------------------------------|---------------|------------------------------------------------------------------------------------------------------------------------------------|
|                                     |      |                                                 |                                               |                             |                                                                                                     | amyloid fibrils, making the fibrils retain a weaker antibacterial effect.                                                      |               |                                                                                                                                    |
| Bednarska (Bednarska et al. 2016)   | 2016 | C29, C30, Hit1 and Hit50                        | Proteome of <i>Staphylococcus epidermidis</i> | Antibacteria                | Higher antibacterial activity against G <sup>+</sup> bacteria than against G <sup>-</sup> bacteria. | Peptides are internalized by bacteria, inducing intracellular aggregation, disturbing cell division.                           | Non-cytotoxic | Only monomers tested                                                                                                               |
| Park (Park et al. 2016)             | 2016 | $\alpha$ -synuclein ( $\alpha$ -Syn)            | $\alpha$ -Syn                                 | Antibacteria and antifungus | Broad (G <sup>+</sup> bacteria, G <sup>-</sup> bacteria and fungus)                                 | The $\alpha$ -Syn interacts with bacterial membrane and fugal cytoplasmic compounds in microbial cells to inhibit cell growth. | -             | Only monomers tested                                                                                                               |
| Wang (Wang et al. 2012)             | 2012 | Human islet amyloid polypeptide (hIAPP)         | hIAPP                                         | Antibacteria                | Higher antibacterial activity against G <sup>+</sup> bacteria than against G <sup>-</sup> bacteria. | -                                                                                                                              | -             | All the three states are effective, but monomer's antimicrobial effect was greater than those of annular protofibrils and fibrils. |
| Soscia (Soscia et al. 2010)         | 2010 | Abeta (A $\beta$ )                              | A $\beta$                                     | Antibacteria and antifungus | Broad (G <sup>+</sup> bacteria, G <sup>-</sup> bacteria and fungus)                                 | -                                                                                                                              | -             | Only monomers tested                                                                                                               |
| Pasupuleti (Pasupuleti et al. 2009) | 2009 | PrP <sub>23-231</sub> and PrP <sub>23-144</sub> | Prion protein (PrP)                           | Antibacteria and antifungi  | Broad (G <sup>+</sup> bacteria, G <sup>-</sup> bacteria and fungus)                                 | -                                                                                                                              | -             | Only monomers tested                                                                                                               |

|                                                                                                 |                  |                                      |                                   |                        |                                                            |                                                                                                                                       |                            |                                                                                                                                              |
|-------------------------------------------------------------------------------------------------|------------------|--------------------------------------|-----------------------------------|------------------------|------------------------------------------------------------|---------------------------------------------------------------------------------------------------------------------------------------|----------------------------|----------------------------------------------------------------------------------------------------------------------------------------------|
| Walsh (Walsh et al. 2014)                                                                       | 2014             | PrP <sub>106-126</sub>               | PrP                               | Antibacterial          | Broad (G <sup>+</sup> bacteria, G <sup>-</sup> bacteria)   | Interacts with the bacterial membrane, results in physical removal of peptide-lipid micelles, causing membrane leakage and cell death | Cytotoxic                  | Only oligomers exhibit antimicrobial activity                                                                                                |
| Hirakura (Hirakura et al. 2002); Hari-Dass R (Hari-Dass et al. 2005); Zheng (Zheng et al. 2020) | 2002, 2005, 2020 | serum amyloid A (SAA)                | SAA                               | Antibacteria           | Broad (G <sup>+</sup> bacteria, G <sup>-</sup> bacteria)   | Ion-channel formation and membrane disruption                                                                                         | -                          | Only monomers tested                                                                                                                         |
| <b>Microbes agglutination</b>                                                                   |                  |                                      |                                   |                        |                                                            |                                                                                                                                       |                            |                                                                                                                                              |
| Chen (Chen et al. 2021)                                                                         | 2021             |                                      | C123 protein, and other species   | Pathogen agglutination | Broad (G <sup>+</sup> bacteria, G <sup>-</sup> and fungus) | Forming amyloid fibrils agglutinating microbes through binding microbial surface carbohydrates                                        | Slight or no cytotoxicity. | Both monomers and fibers, but the effect of fibrils is weaker than that of monomers                                                          |
| Kumar (Kumar et al. 2016)                                                                       | 2016             | A $\beta$                            | A $\beta$                         | Pathogen agglutination | Broad (bacteria and fungus)                                | Forming amyloid fibrils agglutinating microbes through binding microbial surface carbohydrates                                        | -                          | All the monomers, oligomers and fibrils are effective. Compared with monomers, oligomers exhibited potentiated, and protofibrils attenuated. |
| Voth (Voth et al. 2020)                                                                         | 2020             | Amyloids including A $\beta$ and tau | Supernatant of type III secretion | Pathogen agglutination | Bacteria                                                   | Amyloid oligomers bind to the bacteria membrane and cause agglutination                                                               | Cytotoxic                  | Oligomers                                                                                                                                    |

|                                                |      |                                                                                                    |                                                                                                                     |                                                    |                                                                 |                                                                                                                            |                                                                                                              |                       |
|------------------------------------------------|------|----------------------------------------------------------------------------------------------------|---------------------------------------------------------------------------------------------------------------------|----------------------------------------------------|-----------------------------------------------------------------|----------------------------------------------------------------------------------------------------------------------------|--------------------------------------------------------------------------------------------------------------|-----------------------|
|                                                |      |                                                                                                    | system (T3SS) incompetent <i>Pseudomonas aeruginosa</i> infected pulmonary microvascular endothelial cells (PMVECs) |                                                    |                                                                 |                                                                                                                            |                                                                                                              |                       |
| Chu (Chu et al. 2012)                          | 2012 | Human $\alpha$ -defensin 6 (HD6)                                                                   | HD6                                                                                                                 | Pathogen agglutination                             | Bacteria (Only bacteria tested)                                 | Forming amyloid fibrils agglutinating microbes through binding proteinaceous surface appendages                            | -                                                                                                            | Only monomers tested  |
| <b>Microbes agglutination and antimicrobes</b> |      |                                                                                                    |                                                                                                                     |                                                    |                                                                 |                                                                                                                            |                                                                                                              |                       |
| Kurpe (Kurpe et al. 2020)                      | 2020 | R23I(RKKRRQR RRGGSar#(A)GV TDFGVFVEI)<br>R23T(RKKRRQR RRGGSar#(A)G VVEGTVVEVT)<br>V10I(VTDFGVFVEI) | Ribosomal S1 protein                                                                                                | Antibacteria                                       | Not clear? Only G- bacteria <i>Thermus Thermophilus</i> tested. | Coaggregating S1 protein, suppressing the intensity of protein biosynthesis and thus decreasing total numbers of proteins. | Decrease cell viability when using 20 $\mu$ g/mL and more, suppress mitotic activity and migration activity. | Only monomers tested. |
| Hu (Hu et al. 2020)                            | 2020 | phase-transited BSA(PTB)                                                                           | BSA                                                                                                                 | Antibiofilm (Inhibit microbes adhesion to fibrils) | Broad                                                           | -                                                                                                                          | -                                                                                                            | Fibrils               |

|                               |      |                                                                                               |           |                                                                                           |                                                                                               |                                                                                                                                                                                                                                    |               |                      |
|-------------------------------|------|-----------------------------------------------------------------------------------------------|-----------|-------------------------------------------------------------------------------------------|-----------------------------------------------------------------------------------------------|------------------------------------------------------------------------------------------------------------------------------------------------------------------------------------------------------------------------------------|---------------|----------------------|
| Hu (Hu et al. 2018)           | 2018 | Epigallocatechin gallate-binding lysozyme amyloid fibrils hydrogels; lysozyme amyloid fibrils | Lysozyme  | Bacteria agglutination firstly and antibacteria                                           | Broad (G <sup>+</sup> and G <sup>-</sup> bacteria)                                            | Inducing the agglomeration of the bacterial cells firstly and then killing bacteria might through membrane disintegration.                                                                                                         | Non-cytotoxic | Fibrils              |
| Spitzer (Spitzer et al. 2016) | 2016 | A $\beta_{x-42}$ , A $\beta_{1-40}$                                                           | A $\beta$ | A $\beta_{x-42}$ : antimicrobes and pathogen agglutination; A $\beta_{1-40}$ : antifungus | A $\beta_{x-42}$ : broad; A $\beta_{1-40}$ : moderate against fungus, non effect to bacteria. | Pathogen agglutination: forming amyloid fibrils agglutinating microbes; Antimicrobes: not stated.                                                                                                                                  | -             | Only monomers tested |
| Torrent (Torrent et al. 2012) | 2012 | Eosinophil cationic protein (ECP)                                                             | ECP       | Antimicrobes and pathogen agglutination                                                   | Specific to G <sup>-</sup> bacteria                                                           | Specifically binding to lipopolysaccharide (LPS) and forming amyloid fibrils, and thus disrupting lipopolysaccharide bilayer, exposing the internal cytoplasmic membrane to the protein action, promoting the membrane disruption. | -             | Only monomers tested |

Note: Previous well-known antimicrobial peptides or host defense peptides with the amyloid forming ability are not listed in this table. -: Not declared.

Table S2: Effects of amyloid peptides against viruses and their possible mechanisms

| Author                          | Year | Amyloid peptides                                               | Derives                                                    | Monomers or fibers effect                                                                                                                            | Functions                                                                                  | Virus species                                                                                     | Specific or not                                              | Mechanism                                                                                                                          | Cytotoxicity                                           | Others                                                              |
|---------------------------------|------|----------------------------------------------------------------|------------------------------------------------------------|------------------------------------------------------------------------------------------------------------------------------------------------------|--------------------------------------------------------------------------------------------|---------------------------------------------------------------------------------------------------|--------------------------------------------------------------|------------------------------------------------------------------------------------------------------------------------------------|--------------------------------------------------------|---------------------------------------------------------------------|
| Palika (Palika et al. 2021)     | 2021 | $\beta$ -lactoglobulin (BLG)                                   | BLG                                                        | $\beta$ -lactoglobulin amyloid fibril-Fe (BLG AF-Fe) has strong effect, BLG monomer-Fe has moderate effect, while BLG AF or Fe alone have no effect. | Filtration membrane trap eliminate viruses from water by retaining and inactivating virus. | Severe acute respiratory syndrome coronavirus 2 (SARS-CoV-2), <i>H1N1</i> , <i>enterovirus 71</i> | Broad                                                        | The viruses are elongated perpendicular to the surface, and such elongation was driven by the shrinkage of the membrane on drying. | -                                                      | Enveloped, non-enveloped, airborne and waterborne viruses           |
| Michiels (Michiels et al. 2020) | 2020 | Peptide 12B(WD LIQLIVS DGSDLI QLIVSD)                          | Basic polymerase 2 (PB2) APR (381LI QLIVS <sub>387</sub> ) | Monomers and oligomers.                                                                                                                              | 1. Antivirus<br>2. Not specifically interfering with viral entry into cell.                | Influenza A                                                                                       | Specific to influenza A strains, not to influenza B strains. | Peptides 12B induces aggregation and inactivation of PB2, which occurs in the cell.                                                | Dose-dependent red blood cells lysis. No accumulation. | Enveloped virus                                                     |
| Ezzat (Ezzat et al. 2019)       | 2019 | NNFGAIL from IAPP, GNNQQNY from yeast prion protein, A $\beta$ |                                                            | Monomers tested                                                                                                                                      | Virus agglutination                                                                        | Respiratory syncytial virus (RSV), herpes simplex virus type (HSV)                                | -                                                            | Viruses bind amyloidogenic peptides in their corona and catalyze amyloid formation via surface-assisted heterogeneous nucleation.  | -                                                      | RSV catalyzes the amyloid aggregation of NNFGAIL, but not to GNNQQN |



|                                                                                                             |                  |                                                     |           |                     |                                                                                                                        |                                 |                                                |                                                                                                                                                                                            |               |                                                                                                                                      |
|-------------------------------------------------------------------------------------------------------------|------------------|-----------------------------------------------------|-----------|---------------------|------------------------------------------------------------------------------------------------------------------------|---------------------------------|------------------------------------------------|--------------------------------------------------------------------------------------------------------------------------------------------------------------------------------------------|---------------|--------------------------------------------------------------------------------------------------------------------------------------|
|                                                                                                             |                  |                                                     |           |                     |                                                                                                                        |                                 |                                                |                                                                                                                                                                                            |               | Y.                                                                                                                                   |
| Zabrodskaya (Zabrodskaya et al. 2018)<br>Egorov (Egorov et al. 2013)<br>Matusevich (Matusevich et al. 2015) | 2018, 2013, 2015 | PB1(6–13), PB1(6-25)                                | PB1       | Monomers tested     | Antivirus by inhibiting influenza A virus replication in cell culture                                                  | Influenza A                     | Effective to Influenza A of different subtypes | PB1(6–13) monomer interact with PB1 subunit N-terminal region, causing a change of PB1 from an alpha helix to a beta structure, causing PB1 not binding to acidic polymerase (PA) protein. | Non-cytotoxic | Another mechanism is assumed to be PB1 derived peptides competes with the full-size PB1 protein for binding sites on the PA protein. |
| Eimer (Eimer et al. 2018)                                                                                   | 2018             | A $\beta$                                           | A $\beta$ | A $\beta$ oligomers | Viral agglutination                                                                                                    | HSV-1, 6A and 6B                | Not specific                                   | A $\beta$ oligomers bind herpesvirus surface glycoproteins.                                                                                                                                | Non-cytotoxic | Enveloped virus                                                                                                                      |
| Bourgade (Bourgade et al. 2015)                                                                             | 2015             | A $\beta$ <sub>42</sub> and A $\beta$ <sub>40</sub> | A $\beta$ | Monomers tested     | 1. Inhibit HSV-1 replication<br>2. Inhibit HSV-1 infection cells                                                       | HSV-1                           | -                                              | A $\beta$ interference with HSV-1 replication could involve its insertion into the HSV-1 envelope                                                                                          | Non-cytotoxic | D not prevent non-enveloped human adenovirus replication.                                                                            |
| White (White et al. 2014)                                                                                   | 2014             | A $\beta$ <sub>42</sub> and A $\beta$ <sub>40</sub> | A $\beta$ | Monomers tested     | 3. Reduce viral uptake by epithelial cells<br>4. Antivirus<br>5. Virus agglutination<br>6. Increase uptake of virus by | H3N2 and H1N1 influenza A virus | Not specific                                   | -                                                                                                                                                                                          | Non-cytotoxic | Enveloped virus                                                                                                                      |

|                          |      |                        |                                    |                                |                                                               |                                    |                                          |                                                                                                                                                                                                                                         |               |                                                            |
|--------------------------|------|------------------------|------------------------------------|--------------------------------|---------------------------------------------------------------|------------------------------------|------------------------------------------|-----------------------------------------------------------------------------------------------------------------------------------------------------------------------------------------------------------------------------------------|---------------|------------------------------------------------------------|
|                          |      |                        |                                    |                                | neutrophils<br>7. Reduce viral protein synthesis in monocytes |                                    |                                          |                                                                                                                                                                                                                                         |               |                                                            |
| Münc (Munch et al. 2007) | 2007 | PAP <sub>248-286</sub> | Prostatic acidic phosphatase (PAP) | PAP <sub>248-286</sub> fibrils | Viral agglutination                                           | Human immunodeficiency virus (HIV) | Independently of HIV-1 subtype or group. | PPI-2480 and $\alpha$ -synuclein, but not A $\beta$ , also enhance HIV-1 infection. Fibrils agglutinate HIV and enhance viral infection into cells, independent of the viral Env glycoprotein and hence not restricted to retroviruses. | Non-cytotoxic | Enveloped virus. Monomers lost viral agglutination effect. |

Note: Previous well-known antimicrobial peptides or host defense peptides with the amyloid forming ability are not listed in this table. -: Not declared.

## References:

- Bednarska NG, van Eldere J, Gallardo R, Ganesan A, Ramakers M, Vogel I, Baatsen P, Staes A, Goethals M, Hammarstrom P, Nilsson KP, Gevaert K, Schymkowitz J, Rousseau F (2016) Protein aggregation as an antibiotic design strategy. *MOL MICROBIOL* 99:849-865.
- Bouaziz Z, Soussan L, Janot JM, Lepoitevin M, Bechelany M, Djebbi MA, Amara A, Balme S (2017) Structure and antibacterial activity relationships of native and amyloid fibril lysozyme loaded on layered double hydroxide. *Colloids Surf B Biointerfaces* 157:10-17.
- Bourgade K, Garneau H, Giroux G, Le Page AY, Bocti C, Dupuis G, Frost EH, Fulop TJ (2015) beta-Amyloid peptides display protective activity against the human Alzheimer's disease-associated herpes simplex virus-1. *BIOGERONTOLOGY* 16:85-98.
- Chen D, Li J, Pan T, Wu R, Tao Y, Lin H (2021) The broad-spectrum antibiofilm activity of amyloid-forming hexapeptides. *MICROB BIOTECHNOL* 14:656-667.
- Chu H, Pazgier M, Jung G, Nuccio SP, Castillo PA, de Jong MF, Winter MG, Winter SE, Wehkamp J, Shen B, Salzman NH, Underwood MA, Tsolis RM, Young GM, Lu W, Lehrer RI, Baumler AJ, Bevins CL (2012) Human alpha-defensin 6 promotes mucosal innate immunity through self-assembled peptide nanonets. *SCIENCE* 337:477-481.
- Egorov VV, Matusevich OV, Shaldzhyan AA, Skvortsov AN, Zabrodskaya YA, Garmay YP, Landa SB, Lebedev DV, Zarubayev VV, Sirotkin AK, Vasin AV, Kiselev OI (2013) Structural Features of the Peptide Homologous to 6-25 Fragment of Influenza A PB1 Protein. *Int J Pept* 2013:370832.
- Eimer WA, Vijaya KD, Navalpur SN, Rodriguez AS, Mitchell T, Washicosky KJ, Gyorgy B, Breakefield XO, Tanzi RE, Moir RD (2018) Alzheimer's Disease-Associated beta-Amyloid Is Rapidly Seeded by Herpesviridae to Protect against Brain Infection. *NEURON* 99:56-63.
- Engelberg Y, Landau M (2020) The Human LL-37(17-29) antimicrobial peptide reveals a functional supramolecular structure. *NAT COMMUN* 11:3894.
- Ezzat K, Pernemalm M, Palsson S, Roberts TC, Jarver P, Dondalska A, Bestas B, Sobkowiak MJ, Levanen B, Skold M, Thompson EA, Saher O, Kari OK, Lajunen T, Sverremark EE, Nilsson C, Ishchenko Y, Malm T, Wood M, Power UF, Masich S, Linden A, Sandberg JK, Lehtio J, Spetz AL, El AS (2019) The viral protein corona directs viral pathogenesis and amyloid aggregation. *NAT COMMUN* 10:2331.
- Hari-Dass R, Shah C, Meyer DJ, Raynes JG (2005) Serum amyloid A protein binds to outer membrane protein A of gram-negative bacteria. *J BIOL CHEM* 280:18562-18567.
- Hirakura Y, Carreras I, Sipe JD, Kagan BL (2002) Channel formation by serum amyloid A: a potential mechanism for amyloid pathogenesis and host defense. *AMYLOID* 9:13-23.
- Hu B, Shen Y, Adamcik J, Fischer P, Schneider M, Loessner MJ, Mezzenga R (2018) Polyphenol-Binding Amyloid Fibrils Self-Assemble into Reversible Hydrogels with Antibacterial Activity. *ACS NANO* 12:3385-3396.
- Hu X, Tian J, Li C, Su H, Qin R, Wang Y, Cao X, Yang P (2020) Amyloid-Like Protein Aggregates: A New Class of Bioinspired Materials Merging an Interfacial Anchor with Antifouling. *ADV MATER* 32:e2000128.
- Khodaparast L, Khodaparast L, Gallardo R, Louros NN, Michiels E, Ramakrishnan R, Ramakers M, Claes F, Young L, Shahrooei M, Wilkinson H, Desager M, Mengistu TW, Nilsson K, Hammarstrom P, Aertsen A, Carpentier S, Van Eldere J, Rousseau F, Schymkowitz J (2018) Aggregating sequences that occur in many proteins constitute weak spots of bacterial proteostasis. *NAT COMMUN* 9:866.

Kumar DK, Choi SH, Washicosky KJ, Eimer WA, Tucker S, Ghofrani J, Lefkowitz A, McColl G, Goldstein LE, Tanzi RE, Moir RD (2016) Amyloid-beta peptide protects against microbial infection in mouse and worm models of Alzheimer's disease. *SCI TRANSL MED* 8:340r-372r.

Kurpe SR, Grishin SY, Surin AK, Selivanova OM, Fadeev RS, Dzhus UF, Gorbunova EY, Mustaeva LG, Azev VN, Galzitskaya OV (2020) Antimicrobial and Amyloidogenic Activity of Peptides Synthesized on the Basis of the Ribosomal S1 Protein from *Thermus Thermophilus*. *INT J MOL SCI* 21.

Matusevich OV, Egorov VV, Gluzdikov IA, Titov MI, Zarubaev VV, Shtro AA, Slita AV, Dukov MI, Shurygina AP, Smirnova TD, Kudryavtsev IV, Vasin AV, Kiselev OI (2015) Synthesis and antiviral activity of PB1 component of the influenza A RNA polymerase peptide fragments. *Antiviral Res* 113:4-10.

Michiels E, Roose K, Gallardo R, Khodaparast L, Khodaparast L, van der Kant R, Siemons M, Houben B, Ramakers M, Wilkinson H, Guerreiro P, Louros N, Kaptein S, Ibanez LI, Smet A, Baatsen P, Liu S, Vorberg I, Bormans G, Neyts J, Saelens X, Rousseau F, Schymkowitz J (2020) Reverse engineering synthetic antiviral amyloids. *NAT COMMUN* 11:2832.

Munch J, Rucker E, Standker L, Adermann K, Goffinet C, Schindler M, Wildum S, Chinnadurai R, Rajan D, Specht A, Gimenez-Gallego G, Sanchez PC, Fowler DM, Koulov A, Kelly JW, Mothes W, Grivel JC, Margolis L, Keppler OT, Forssmann WG, Kirchhoff F (2007) Semen-derived amyloid fibrils drastically enhance HIV infection. *CELL* 131:1059-1071.

Palika A, Armanious A, Rahimi A, Medaglia C, Gasbarri M, Handschin S, Rossi A, Pohl MO, Busnadiago I, Gubeli C, Anjanappa RB, Bolisetty S, Peydayesh M, Stertz S, Hale BG, Tapparel C, Stellacci F, Mezzenga R (2021) An antiviral trap made of protein nanofibrils and iron oxyhydroxide nanoparticles. *NAT NANOTECHNOL*.

Park SC, Moon JC, Shin SY, Son H, Jung YJ, Kim NH, Kim YM, Jang MK, Lee JR (2016) Functional characterization of alpha-synuclein protein with antimicrobial activity. *Biochem Biophys Res Commun* 478:924-928.

Pasupuleti M, Roupe M, Rydengard V, Surewicz K, Surewicz WK, Chalupka A, Malmsten M, Sorensen OE, Schmidtchen A (2009) Antimicrobial activity of human prion protein is mediated by its N-terminal region. *PLOS ONE* 4:e7358.

Salinas N, Colletier JP, Moshe A, Landau M (2018) Extreme amyloid polymorphism in *Staphylococcus aureus* virulent PSMalpha peptides. *NAT COMMUN* 9:3512.

Salinas N, Tayeb-Fligelman E, Sammito MD, Bloch D, Jelinek R, Noy D, Uson I, Landau M (2021) The amphibian antimicrobial peptide uperin 3.5 is a cross-alpha/cross-beta chameleon functional amyloid. *Proc Natl Acad Sci U S A* 118.

Schnaider L, Brahmachari S, Schmidt NW, Mensa B, Shaham-Niv S, Bychenko D, Adler-Abramovich L, Shimon L, Kolusheva S, DeGrado WF, Gazit E (2017) Self-assembling dipeptide antibacterial nanostructures with membrane disrupting activity. *NAT COMMUN* 8:1365.

Schnaider L, Rosenberg A, Kreiser T, Kolusheva S, Gazit E, Berman J (2020) Peptide Self-Assembly Is Linked to Antibacterial, but Not Antifungal, Activity of Histatin 5 Derivatives. *MSPHERE* 5.

Soscia SJ, Kirby JE, Washicosky KJ, Tucker SM, Ingelsson M, Hyman B, Burton MA, Goldstein LE, Duong S, Tanzi RE, Moir RD (2010) The Alzheimer's disease-associated amyloid beta-protein is an antimicrobial peptide. *PLOS ONE* 5:e9505.

Spitzer P, Condic M, Herrmann M, Oberstein TJ, Scharin-Mehlmann M, Gilbert DF, Friedrich O, Gromer T, Kornhuber J, Lang R, Maler JM (2016) Amyloidogenic amyloid-beta-peptide variants

induce microbial agglutination and exert antimicrobial activity. *Sci Rep* 6:32228.

Torrent M, Pulido D, Nogues MV, Boix E (2012) Exploring new biological functions of amyloids: bacteria cell agglutination mediated by host protein aggregation. *PLOS PATHOG* 8:e1003005.

Tu W, Xue K, Lou S, Zhu C, Yu Z (2021) Self-assembly of virulent amyloid-derived peptides into nanoantibacterials. *NANOSCALE* 13:9864-9872.

Voth S, Gwin M, Francis CM, Balczon R, Frank DW, Pittet JF, Wagener BM, Moser SA, Alexeyev M, Housley N, Audia JP, Piechocki S, Madera K, Simmons A, Crawford M, Stevens T (2020) Virulent *Pseudomonas aeruginosa* infection converts antimicrobial amyloids into cytotoxic prions. *FASEB J* 34:9156-9179.

Walsh P, Vanderlee G, Yau J, Campeau J, Sim VL, Yip CM, Sharpe S (2014) The mechanism of membrane disruption by cytotoxic amyloid oligomers formed by prion protein(106-126) is dependent on bilayer composition. *J BIOL CHEM* 289:10419-10430.

Wang L, Liu Q, Chen JC, Cui YX, Zhou B, Chen YX, Zhao YF, Li YM (2012) Antimicrobial activity of human islet amyloid polypeptides: an insight into amyloid peptides' connection with antimicrobial peptides. *BIOL CHEM* 393:641-646.

Wei Z, Wu S, Xia J, Shao P, Sun P, Xiang N (2021) Enhanced Antibacterial Activity of Hen Egg-White Lysozyme against *Staphylococcus aureus* and *Escherichia coli* due to Protein Fibrillation. *BIOMACROMOLECULES* 22:890-897.

White MR, Kandel R, Tripathi S, Condon D, Qi L, Taubenberger J, Hartshorn KL (2014) Alzheimer's associated beta-amyloid protein inhibits influenza A virus and modulates viral interactions with phagocytes. *PLOS ONE* 9:e101364.

Zabrodskaya YA, Lebedev DV, Egorova MA, Shaldzhyan AA, Shvetsov AV, Kuklin AI, Vinogradova DS, Klopov NV, Matusevich OV, Cheremnykh TA, Dattani R, Egorov VV (2018) The amyloidogenicity of the influenza virus PB1-derived peptide sheds light on its antiviral activity. *BIOPHYS CHEM* 234:16-23.

Zheng H, Li H, Zhang J, Fan H, Jia L, Ma W, Ma S, Wang S, You H, Yin Z, Li X (2020) Serum amyloid A exhibits pH dependent antibacterial action and contributes to host defense against *Staphylococcus aureus* cutaneous infection. *J BIOL CHEM* 295:2570-2581.
